# Supplementary material for: Perceived impact of heat stress on health and productivity of tropical female garment workers – A comparison between cool and hot months
Source: Research Square preprint supplement (doi:10.21203/rs.3.rs-5963061/v1), 2025-04-04
Supplement: Supplementary file 1 [file af041256c0e808c1dff9170b.docx]

# Supplementary Materials

**Questionnaires for Garment Workers**

**Part 1: Concerning on demographics of interviewee**

| 1. Do you agree to participate in this survey? Remember, you can withdraw at any time. | ⃝ Yes  ⃝ No (Stop the survey) |
| --- | --- |
| 2. Name of the interviewee |  |
| 3. Age | years |
| 4. How tall are you? | m |
| 5. What is your approximate mass? | kg |
| 6. Gender | ⃝ Male  ⃝ Female |
| 7. Designation | ⃝ Worker  ⃝ Assistant  ⃝ Team leader  ⃝ Supervisor  ⃝ Other___________________________ |
| 8. Education | ⃝ Illiterate  ⃝ Primary  ⃝ Secondary  ⃝ High school  ⃝ University  ⃝ Other___________________________ |
| 9. Smoking | ⃝ Smoker  ⃝ Non-smoker  ⃝ Ex-smoker |
| 10. Consuming alcohol | ⃝ Yes  ⃝ No  ⃝ Ex-drinker |
| 11. Any existing illness? | ⃝ No  ⃝ Diabetes  ⃝ Hypertension  ⃝ Respiratory illness  ⃝ Other___________________________ |

**Part 2: Concerning type of the work**

| 1. Department | ⃝ Sewing  ⃝ Cutting  ⃝ Ironing  ⃝ Other__________________________ |
| --- | --- |
| 2. How long have you been employed here? | ___________________________years ___________________________months |
| 3. Have you been working here in different position?  If yes, what was your position? | ⃝ Yes  ⃝ No  Position: _________________________ |
| 4. How many hours per day do you usually work? | ___________________________hours  From____________ To_____________ |
| 5. Do you work near a direct heat source (e.g., naked flame/hot air/outdoors/radiant heat) | ⃝ Yes  ⃝ No |

**Part 3: Concerning on heat exposure at work**

| 1. Over the last 3 months, how do you judge the thermal environment in which you generally work? | ⃝ Very cold  ⃝ Cold  ⃝ Slightly cold  ⃝ Neither cold nor hot  ⃝ Slightly hot  ⃝ Hot  ⃝ Very hot |
| --- | --- |
| 2. What is your perception about outfit material? | ⃝ Comfortable  ⃝ Moderately comfortable  ⃝ Uncomfortable  ⃝ Other_________________________ |
| 3. Upper clothes | ⃝ Short sleeves  ⃝ Long sleeves  ⃝ Long-sleeves turtle neck  ⃝ Other_________________________ |
| 4. Lower clothes | ⃝ Short skirt  ⃝ Long skirt  ⃝ Long pants  ⃝ Other___________________________ |
| 5. How many outer layers (of clothes) do you wear? | ⃝ 1 layer  ⃝ 2 layers  ⃝ Thick cloth  ⃝ Other_________________________ |
| 6. (If Question 5 is thick cloth or more than one layer) Please specify reason. |  |
| 7. Do you feel hotter with outfit/uniform? Does the dress material increase heat stress? | ⃝ Sure  ⃝ Maybe  ⃝ Not sure  ⃝ No, not at all |

**Part 4: Concerning on impacts of heat stress on health**

| 1. Over the last 3 months, have you felt any of the following heat-related symptoms? | □ Feeling hot  □ Heavy sweating  □ Thirst  □ Fatigued/Tired  □ Headache  □ Irritable or Aggressive  □ Clammy skin or Goosebumps  □ Rash  □ Concentration loss  □ Muscle cramps  □ Muscle weakness  □ Vomiting  □ Nausea  □ Blurred vision  □ Dizzy/Lightheaded  □ Loss of consciousness  □ Fainting  □ Confusion  □ Convulsions/Seizures  □ Heart attack  □ Other_________________________ |
| --- | --- |

**Part 5: Concerning on impacts of heat stress on productivity**

| 1. Have you taken sick leave as a result of exposure to heat, or symptoms associated with heat stress in the last 3 months?  If yes, please specify approximately how many days. | ⃝ Yes  ⃝ No  _________________________hour/week |
| --- | --- |
| 2. During the last 3 months, have you been advised to take off due to heat-related sickness? | ⃝ Yes  ⃝ No |
| 3. During the last 3 months, have you visited a doctor due to heat-related sickness? | ⃝ Yes  ⃝ No |
| 4. During the last 3 months, have you been admitted in hospital/medical centre due to heat-related sickness?  If yes, please specify approximately how many days. | ⃝ Yes  ⃝ No  ______________________________days |
| 5. During the last 3 months, do you feel heat has impaired your ability to do any of the following at work? | □ Motivation to complete tasks  □ Speed of task completion  □ Ability to do physical work  □ Focus on task  □ Attention to small details  □ Quality of work  □ Understanding of tasks  □ Maintain your usual productivity |
| 6. How does heat affect other aspects of your work (during the last 3 months)? | □ Absenteeism  □ Feeling tired  □ Feeling sleepy  □ Less productivity  □ Irritation/Interpersonal issues  □ Work related issues with manager  □ Take more time to complete same task  □ Job satisfaction |

**Part 6: Concerning on heat relief measures**

| 1. Which of the following measures have you used to manage heat stress at work, during the last 3 months? | □ Resting in front of a fan  □ Resting in a rest room  □ Resting in an air-conditioned building  □ Using ice packs to cool body  □ Pouring water over head  □ Showering, bathing in cool water  □ Using your own portable fan  □ Drinking slushies/crushed ice/frozen sport drinks  □ Changing clothing during shift  □ Increasing water intake/hydration |
| --- | --- |
| 2. Which of the following measures have you used to manage heat stress outside of work, during the last 3 months? | □ Resting in shade  □ Resting in front of a fan  □ Resting in an air-conditioned room/home  □ Resting in an air-conditioned public space  □ Showering, bath or swimming in cool water  □ Drinking slushies/crushed ice/frozen sports drinks  □ Sleeping for longer, going to bed early, or having naps after work  □ Increasing water intake/hydration after work  □ Increasing water intake/hydration before work  □ Increasing alcohol consumption  □ Decreasing alcohol consumption  □ Exercising to maintain or increase fitness |

Table . Comparison of daily dry bulb temperature and WBGT taken from the HOTHAPS program during the actual survey period for cool months and during the time used as a proxy for survey period for cool months

|  | **Cool months-actual**  **(Nov 2021 to Jan 2022)** | | | **Cool months-proxy**  **(Nov 2022 to Jan 2023)** | | | **p-value** |
| --- | --- | --- | --- | --- | --- | --- | --- |
|  | Min | Max | Avg. ± SD | Min | Max | Avg. ± SD |
| Ta (oC) | 24.2 | 29.7 | 27.6 ± 1.2 | 23.5 | 30.3 | 27.3 ± 1.6 | 0.2 |
| WBGT (oC) | 20.7 | 27.3 | 24.7 ± 1.4 | 20.0 | 27.3 | 24.5 ± 2.0 | 0.6 |

Table 2. Respondents’ choice of clothing and their perceptions during the cool and hot months

|  | **Cool months,**  **N = 3801** | **Hot months,**  **N = 3731** | **Difference2** | **95% CI3** | **p-value** |
| --- | --- | --- | --- | --- | --- |
| **Upper clothes** | | | | | |
| Short sleeves | 21% | 22% | -0.1% | -6%, 6% | > 0.9 |
| Long sleeves | 53% | 78% | -25% | -32%, -18% | < 0.001 |
| T-shirt | 25% | 0% | 25% | 21%, 30% | < 0.001 |
| Other | 0% | 1% | -0.3% | -1%, 1% | > 0.9 |
| **Lower clothes** | | | | | |
| Short skirt | 0% | 0% |  |  |  |
| Long skirt | 1% | 0% | 1.1% | -0.2%, 2% | 0.13 |
| Long pants | 99% | 99% | -0.3% | -2%, 2% | > 0.9 |
| Other | 0% | 1% | -0.8% | -2%, 0.6% | 0.4 |
| **Layers of outer clothes** | | | | | |
| 1 layer | 44% | 46% | -2% | -9%, 6% | 0.7 |
| 2 layers | 56% | 54% | 2% | -6%, 9% | 0.7 |
| Thick cloth | 0% | 0% |  |  |  |
| Other | 0% | 0% |  |  |  |
| **Perception about outfit material** | | | | | |
| Comfortable | 57% | 75% | -17% | -24%, -10% | < 0.001 |
| Moderately comfortable | 41% | 24% | 17% | 10%, 23% | < 0.001 |
| Uncomfortable | 2% | 1% | 1% | -0.7%, 3% | 0.3 |
| 1 % | | | | | |
| 2 Hot months – Cool months | | | | | |
| 3 CI = Confidence Interval | | | | | |


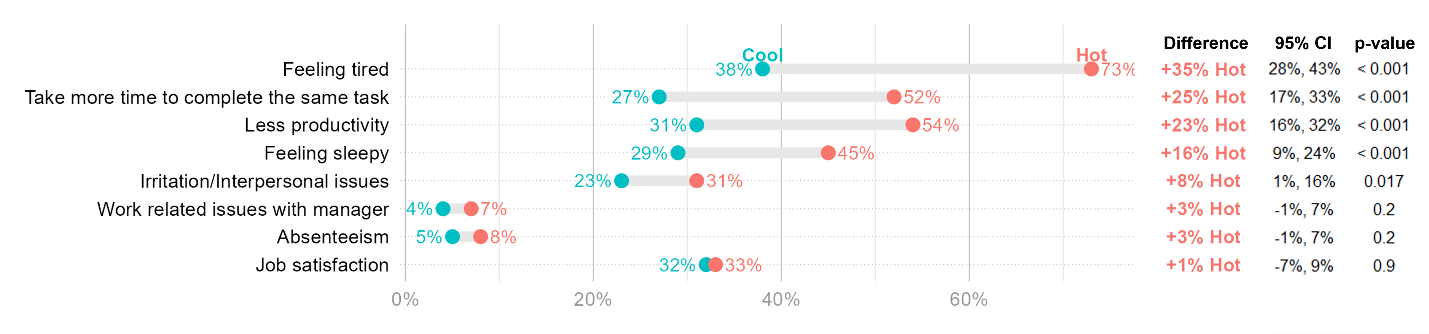


Figure . Workers’ perceived impact of heat stress on other aspects of their work during the cool and hot months


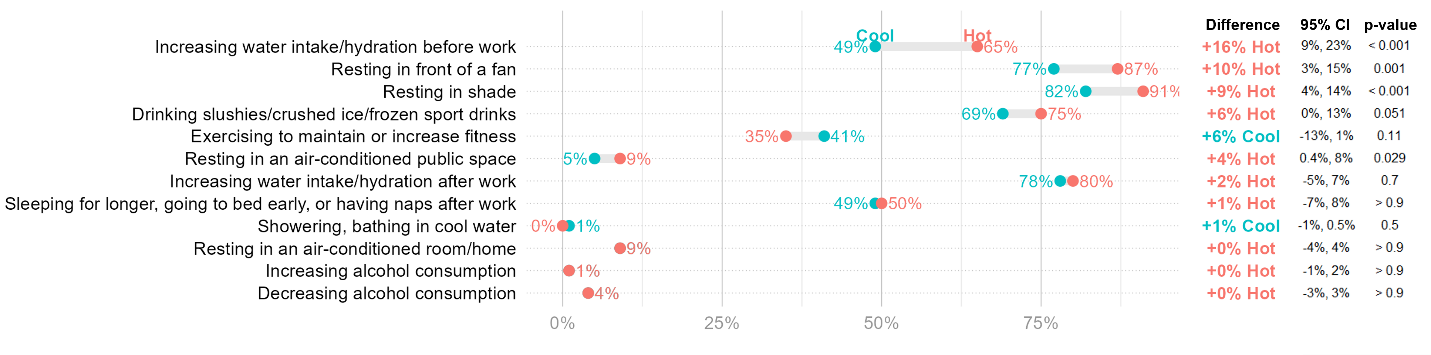


Figure . Workers’ heat relief measures outside of their work during the cool and hot months
